# Supplementary material
Source: PubMed Central journal article supplement (PMC2615498)
Supplement: M808303200_1.pdf [file M808303200_1.pdf]

## Supplementary Figures

(I) see Fig.1 legend.

| N-terminus 5-aa truncation mutants                       | TDO/QDO  |
|----------------------------------------------------------|----------|
| DENFKRCFRDFCFPLKMRMERQSTSRVRNTVQDPAYLRDIDGMNKPV          | +++/>+++ |
| RCFRDFCFPLKMRMERQSTSRVRNTVQDPAYLRDIDGMNKPV               | ++/++    |
| <b>FCFPL</b> KMRMERQSTSRVRNTVQDPAYLRDIDGMNKPV            | ++/++    |
| KMRMERQSTSRVRNTVQDPAYLRDIDGMNKPV                         | -/-      |
| RQSTSRVRNTVQDPAYLRDIDGMNKPV                              | -/-      |
| RVRNTVQDPAYLRDIDGMNKPV                                   | -/-      |
| C-terminus 5-aa truncation mutants                       |          |
| DENFKRCFRDFCFPLKMRMERQSTSRVRNTVQDPAYLRDIDG               | ++/++    |
| DENFKRCFRDFCFPLKMRMERQSTSRVRNTVQDPAYL                    | ++/++    |
| DENFKRCFRDFCFPLKMRMERQSTSRVRNTVQ                         | ++/++    |
| DENFKRCFRDFCFPLKMRMERQ <b>STSRV</b>                      | ++/++    |
| DENFKRCFRDFCFPLK <b>MRMERQ</b>                           | +/>+     |
| DENFKRCFRDFC <b>FPLKM</b>                                | +/>-     |
| DENFKRCFRDFC                                             | -/-      |
| DENFKRC                                                  | -/-      |
| Double alanine-substitution mutants                      |          |
| DENFKRCFRD <b>FCFPLKMR</b> MERQSTSRVRNTVQDPAYLRDIDGMNKPV | +++/>+++ |
| ----- <b>AA</b> -----                                    | ++/-     |
| ----- <b>AA</b> -----                                    | -/-      |
| ----- <b>AA</b> -----                                    | ++/-     |
| ----- <b>AA</b> -----                                    | -/-      |
| -----AA-----                                             | ++/++    |
| -----AA-----                                             | ++/++    |

(II) see Fig.4 legend.

| N-terminus 10-aa truncation mutants                                                                       |  | TDO/QDO   |
|-----------------------------------------------------------------------------------------------------------|--|-----------|
| KARVPDL <b>DKR</b> KYLVPSDLTVGQFYFLIRKRIHLRPEDALFFFVNNTIPPTSATMGQLYEDNHEEDYFLYVAYSDES <b>VYGK</b>         |  | +++ / +++ |
| <b>KYL</b> VP <b>SDL</b> TVGQFYFLIRKRIHLRPEDALFFFVNNTIPPTSATMGQLYEDNHEEDYFLYVAYSDES <b>VYGK</b>           |  | +++ / ++  |
| GQFYFLIRKRIHLRPEDALFFFVNNTIPPTSATMGQLYEDNHEEDYFLYVAYSDES <b>VYGK</b>                                      |  | - / -     |
| IHLRPEDALFFFVNNTIPPTSATMGQLYEDNHEEDYFLYVAYSDES <b>VYGK</b>                                                |  | - / -     |
| C-terminus 10-aa truncation mutants                                                                       |  | TDO/QDO   |
| KARVPDL <b>DKR</b> KYLVPSDLTVGQFYFLIRKRIHLRPEDALFFFVNNTIPPTSATMGQLYEDNHEEDYFLYV <b>AYSDES</b> <b>VYGK</b> |  | +++ / +++ |
| KARVPDL <b>DKR</b> KYLVPSDLTVGQFYFLIRKRIHLRPEDALFFFVNNTIPPTSATMGQLYEDNHEEDYFLYV                           |  | - / -     |
| KARVPDL <b>DKR</b> KYLVPSDLTVGQFYFLIRKRIHLRPEDALFFFVNNTIPPTSATMGQLYED                                     |  | - / -     |
| KARVPDL <b>DKR</b> KYLVPSDLTVGQFYFLIRKRIHLRPEDALFFFVNNTIP                                                 |  | - / -     |
| N-terminus double truncation mutants                                                                      |  | TDO/QDO   |
| KARVPDL <b>DKR</b> KYLVPSDLTVGQFYFLIRKRIHLRPEDALFFFVNNTIPPTSATMGQLYEDNHEEDYFLYV <b>AYSDES</b> <b>VYGK</b> |  | +++ / +++ |
| RVPDL <b>DKR</b> KYLVPSDLTVGQFYFLIRKRIHLRPEDALFFFVNNTIPPTSATMGQLYEDNHEEDYFLYV <b>AYSDES</b> <b>VYGK</b>   |  | +++ / +++ |
| PDL <b>DKR</b> KYLVPSDLTVGQFYFLIRKRIHLRPEDALFFFVNNTIPPTSATMGQLYEDNHEEDYFLYV <b>AYSDES</b> <b>VYGK</b>     |  | +++ / +++ |
| <b>LD</b> KRKYLVPSDLTVGQFYFLIRKRIHLRPEDALFFFVNNTIPPTSATMGQLYEDNHEEDYFLYV <b>AYSDES</b> <b>VYGK</b>        |  | +++ / ++  |
| KRKYLVPSDLTVGQFYFLIRKRIHLRPEDALFFFVNNTIPPTSATMGQLYEDNHEEDYFLYV <b>AYSDES</b> <b>VYGK</b>                  |  | +++ / -   |
| KYLVPSDLTVGQFYFLIRKRIHLRPEDALFFFVNNTIPPTSATMGQLYEDNHEEDYFLYV <b>AYSDES</b> <b>VYGK</b>                    |  | +++ / ++  |
| <b>LV</b> PSDLTVGQFYFLIRKRIHLRPEDALFFFVNNTIPPTSATMGQLYEDNHEEDYFLYV <b>AYSDES</b> <b>VYGK</b>              |  | +++ / +++ |
| <b>PS</b> DLTVGQFYFLIRKRIHLRPEDALFFFVNNTIPPTSATMGQLYEDNHEEDYFLYV <b>AYSDES</b> <b>VYGK</b>                |  | ++ / -    |
| DLTVGQFYFLIRKRIHLRPEDALFFFVNNTIPPTSATMGQLYEDNHEEDYFLYV <b>AYSDES</b> <b>VYGK</b>                          |  | - / -     |
| TVGQFYFLIRKRIHLRPEDALFFFVNNTIPPTSATMGQLYEDNHEEDYFLYV <b>AYSDES</b> <b>VYGK</b>                            |  | - / -     |
| GQFYFLIRKRIHLRPEDALFFFVNNTIPPTSATMGQLYEDNHEEDYFLYV <b>AYSDES</b> <b>VYGK</b>                              |  | - / -     |
| C-terminus double truncation mutants                                                                      |  | TDO/QDO   |
| KARVPDL <b>DKR</b> KYLVPSDLTVGQFYFLIRKRIHLRPEDALFFFVNNTIPPTSATMGQLYEDNHEEDYFLYV <b>AYSDES</b> <b>VY</b>   |  | +++ / +++ |
| KARVPDL <b>DKR</b> KYLVPSDLTVGQFYFLIRKRIHLRPEDALFFFVNNTIPPTSATMGQLYEDNHEEDYFLYV <b>AYSDES</b>             |  | +++ / +++ |
| KARVPDL <b>DKR</b> KYLVPSDLTVGQFYFLIRKRIHLRPEDALFFFVNNTIPPTSATMGQLYEDNHEEDYFLYV <b>AYS</b> <b>SD</b>      |  | +++ / +++ |
| KARVPDL <b>DKR</b> KYLVPSDLTVGQFYFLIRKRIHLRPEDALFFFVNNTIPPTSATMGQLYEDNHEEDYFLYV <b>AY</b>                 |  | ++ / -    |
| KARVPDL <b>DKR</b> KYLVPSDLTVGQFYFLIRKRIHLRPEDALFFFVNNTIPPTSATMGQLYEDNHEEDYFLYV                           |  | - / -     |
